# Supplementary material
Source: HighWire-hosted journal article supplement (https://openres.ersjournals.com/content/5/3/00106-2019)

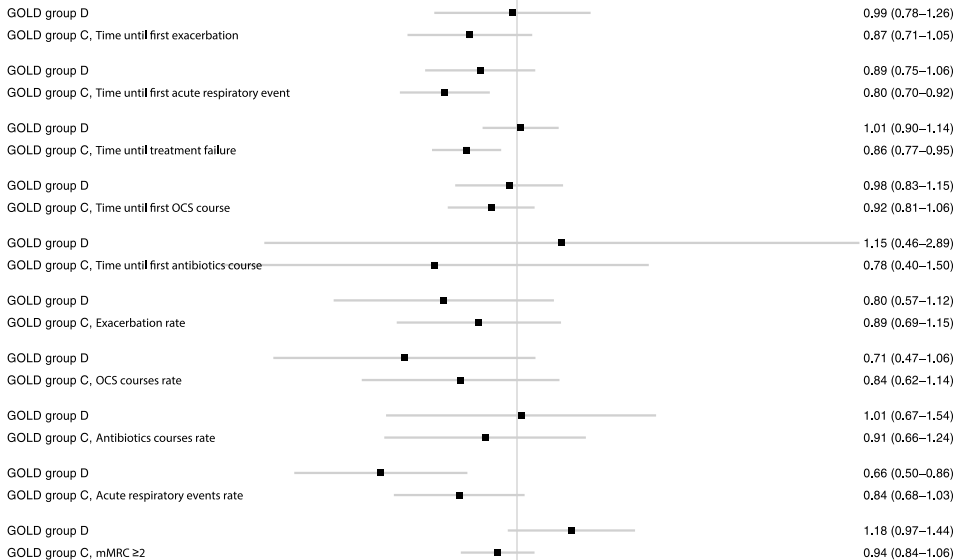

Favours Triple therapy ← → Favours LAMA/LABA

0.4 0.5 0.6 0.7 0.8 0.9 1 1.5 2 3  
Hazard/Rate/Odds ratio

Propensity score matched

Supplement: inline-supplementary-material-3 [file inline-supplementary-material-3.pdf]
